# Supplementary material for: Targeted temperature management at 33 degrees Celsius in patients with high-grade aneurysmal subarachnoid hemorrhage: a protocol for a multicenter randomized controlled study
Source: PubMed Central journal article supplement — Ann Transl Med. 2021 Apr;9(7):581. doi: 10.21037/atm-20-4719 (PMC8105800; doi:10.21037/atm-20-4719), 2021-04
Supplement: atm-09-07-581-rc.pdf [file atm-09-07-581-rc.pdf]

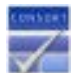

## CONSORT 2010 checklist of information to include when reporting a randomised trial\*

| Section/Topic                    | Item No | Checklist item                                                                                                                                                                              | Reported on Page Number/Line Number | Reported on Section/Paragraph    |
|----------------------------------|---------|---------------------------------------------------------------------------------------------------------------------------------------------------------------------------------------------|-------------------------------------|----------------------------------|
| <b>Title and abstract</b>        |         |                                                                                                                                                                                             |                                     |                                  |
|                                  | 1a      | Identification as a randomised trial in the title                                                                                                                                           | Page1/Line1-4                       | Title/Paragraph1                 |
|                                  | 1b      | Structured summary of trial design, methods, results, and conclusions (for specific guidance see Table 2)                                                                                   | Page3/Line33-51                     | Abstract/Paragraph1-3            |
| <b>Introduction</b>              |         |                                                                                                                                                                                             |                                     |                                  |
| Background and objectives        | 2a      | Scientific background and explanation of rationale                                                                                                                                          | Page4-6/Line55-108                  | Introduction/Paragraph1-4        |
|                                  | 2b      | Specific objectives or hypotheses                                                                                                                                                           | Page6/Line109-112                   | Introduction/Paragraph5          |
| <b>Methods</b>                   |         |                                                                                                                                                                                             |                                     |                                  |
| Trial design                     | 3a      | Description of trial design (such as parallel, factorial) including allocation ratio                                                                                                        | Page6/Line116-118                   | Study design/Paragraph1          |
|                                  | 3b      | Important changes to methods after trial commencement (such as eligibility criteria), with reasons                                                                                          | Page7/Line122-131                   | Study population/Paragraph1      |
| Participants                     | 4a      | Eligibility criteria for participants                                                                                                                                                       | Page7/Line122-131                   | Study population/Paragraph1      |
|                                  | 4b      | Settings and locations where the data were collected                                                                                                                                        |                                     |                                  |
| Interventions                    | 5       | The interventions for each group with sufficient details to allow replication, including how and when they were actually administered                                                       | Page8-10/Line148-205                | Treatment and management/Para1-3 |
| Outcomes                         | 6a      | Completely defined pre-specified primary and secondary outcome measures, including how and when they were assessed                                                                          | Page12/Line245-252                  | Endpoints/Paragraph1             |
|                                  | 6b      | Any changes to trial outcomes after the trial commenced, with reasons                                                                                                                       |                                     |                                  |
| Sample size                      | 7a      | How sample size was determined                                                                                                                                                              | Page12/Line255-260                  | Sample size/Paragraph1           |
|                                  | 7b      | When applicable, explanation of any interim analyses and stopping guidelines                                                                                                                |                                     |                                  |
| Randomisation:                   |         |                                                                                                                                                                                             |                                     |                                  |
| Sequence generation              | 8a      | Method used to generate the random allocation sequence                                                                                                                                      | Page7/Line138-144                   | Randomization and blinding/Para1 |
|                                  | 8b      | Type of randomisation; details of any restriction (such as blocking and block size)                                                                                                         | Page7/Line138-139                   | Randomization and blinding/Para1 |
| Allocation concealment mechanism | 9       | Mechanism used to implement the random allocation sequence (such as sequentially numbered containers), describing any steps taken to conceal the sequence until interventions were assigned | Page7/Line139-141                   | Randomization and blinding/Para1 |

|                                                      |     |                                                                                                                                                   |                       |                                   |
|------------------------------------------------------|-----|---------------------------------------------------------------------------------------------------------------------------------------------------|-----------------------|-----------------------------------|
| Implementation                                       | 10  | Who generated the random allocation sequence, who enrolled participants, and who assigned participants to interventions                           | Page7/Line139-143     | Randomization and blinding/Para1  |
| Blinding                                             | 11a | If done, who was blinded after assignment to interventions (for example, participants, care providers, those assessing outcomes) and how          | Page7/Line141-142     | Randomization and blinding/Para1  |
|                                                      | 11b | If relevant, description of the similarity of interventions                                                                                       | N/A                   | N/A                               |
| Statistical methods                                  | 12a | Statistical methods used to compare groups for primary and secondary outcomes                                                                     | Page13/Line266-276    | Statistical analysis/Paragraph2-3 |
|                                                      | 12b | Methods for additional analyses, such as subgroup analyses and adjusted analyses                                                                  | Page13/Line269-270    | Statistical analysis/Paragraph2   |
| <b>Results</b>                                       |     |                                                                                                                                                   |                       |                                   |
| Participant flow (a diagram is strongly recommended) | 13a | For each group, the numbers of participants who were randomly assigned, received intended treatment, and were analysed for the primary outcome    | Figure1               | Figure1                           |
|                                                      | 13b | For each group, losses and exclusions after randomisation, together with reasons                                                                  | Page11/Line236-241    | Withdrawal criteria/Paragraph1    |
| Recruitment                                          | 14a | Dates defining the periods of recruitment and follow-up                                                                                           | Page12/Line244-245    | Endpoints/Paragraph1              |
|                                                      | 14b | Why the trial ended or was stopped                                                                                                                | Page13/Line267-269    | Statistical analysis/Paragraph2   |
| Baseline data                                        | 15  | A table showing baseline demographic and clinical characteristics for each group                                                                  | Table1                | Table1                            |
| Numbers analysed                                     | 16  | For each group, number of participants (denominator) included in each analysis and whether the analysis was by original assigned groups           | Page12-13/Line262-264 | Statistical analysis/Paragraph1   |
| Outcomes and estimation                              | 17a | For each primary and secondary outcome, results for each group, and the estimated effect size and its precision (such as 95% confidence interval) | Page13/Line271-276    | Statistical analysis/Paragraph2   |
|                                                      | 17b | For binary outcomes, presentation of both absolute and relative effect sizes is recommended                                                       | Page13/Line271-274    | Statistical analysis/Paragraph2   |
| Ancillary analyses                                   | 18  | Results of any other analyses performed, including subgroup analyses and adjusted analyses, distinguishing pre-specified from exploratory         | Page13/Line271-275    | Statistical analysis/Paragraph3   |
| Harms                                                | 19  | All important harms or unintended effects in each group (for specific guidance see CONSORT for harms)                                             | Page10/Line207-214    | Safety/Paragraph1                 |
| <b>Discussion</b>                                    |     |                                                                                                                                                   |                       |                                   |
| Limitations                                          | 20  | Trial limitations, addressing sources of potential bias, imprecision, and, if relevant, multiplicity of analyses                                  | Page14/Line288-289    | Discussion/Paragraph1             |
| Generalisability                                     | 21  | Generalisability (external validity, applicability) of the trial findings                                                                         | Page14/Line293-295    | Discussion/Paragraph2             |
| Interpretation                                       | 22  | Interpretation consistent with results, balancing benefits and harms, and considering other relevant evidence                                     | Page14/Line301-306    | Discussion/Paragraph3             |
| <b>Other information</b>                             |     |                                                                                                                                                   |                       |                                   |
| Registration                                         | 23  | Registration number and name of trial registry                                                                                                    | Page3/Line52          | Abstract/Paragraph5               |

|          |    |                                                                                 |                    |                    |
|----------|----|---------------------------------------------------------------------------------|--------------------|--------------------|
| Protocol | 24 | Where the full trial protocol can be accessed, if available                     |                    |                    |
| Funding  | 25 | Sources of funding and other support (such as supply of drugs), role of funders | Page15/Line311-315 | Funding/Paragraph1 |

\*We strongly recommend reading this statement in conjunction with the CONSORT 2010 Explanation and Elaboration for important clarifications on all the items. If relevant, we also recommend reading CONSORT extensions for cluster randomised trials, non-inferiority and equivalence trials, non-pharmacological treatments, herbal interventions, and pragmatic trials. Additional extensions are forthcoming: for those and for up to date references relevant to this checklist, see [www.consort-statement.org](http://www.consort-statement.org).

**Table 2 Items to include when reporting a randomized trial in a journal or conference abstract**

| Item               | Description                                                                                                 | Reported on Page Number/Line Number | Reported on Section/Paragraph         |
|--------------------|-------------------------------------------------------------------------------------------------------------|-------------------------------------|---------------------------------------|
| Title              | Identification of the study as randomized                                                                   | Page1/Line1-4                       | Title/Paragraph1                      |
| Authors *          | Contact details for the corresponding author                                                                | Page1/Line13-17                     | Title/Paragraph9-12                   |
| Trial design       | Description of the trial design (e.g. parallel, cluster, non-inferiority)                                   | Page6/Line116-118                   | Study design/Paragraph1               |
| <b>Methods</b>     |                                                                                                             |                                     |                                       |
| Participants       | Eligibility criteria for participants and the settings where the data were collected                        | Page7/Line122-131                   | Study population/Paragraph1           |
| Interventions      | Interventions intended for each group                                                                       | Page8-10/Line162-204                | Treatment and management/Paragraph2-3 |
| Objective          | Specific objective or hypothesis                                                                            | Page6/Line109-111                   | Background/Paragraph5                 |
| Outcome            | Clearly defined primary outcome for this report                                                             | Page12/Line244-245                  | Endpoints/Paragraph1                  |
| Randomization      | How participants were allocated to interventions                                                            | Page6/Line139-141                   | Randomization and blinding/Paragraph1 |
| Blinding (masking) | Whether or not participants, care givers, and those assessing the outcomes were blinded to group assignment | Page7/Line141-143                   | Randomization and blinding/Paragraph1 |
| <b>Results</b>     |                                                                                                             |                                     |                                       |
| Numbers randomized | Number of participants randomized to each group                                                             | Page6/Line139-141                   | Randomization and blinding/Paragraph1 |
| Recruitment        | Trial status                                                                                                | Page13/Line279-280                  | Discussion/Paragraph1                 |
| Numbers analysed   | Number of participants analysed in each group                                                               | Page13/Line266-276                  | Statistical analysis/Paragraph2-3     |
| Outcome            | For the primary outcome, a result for each group and the estimated effect size and its precision            | Page13-14/Line285-287               | Discussion/Paragraph1                 |
| Harms              | Important adverse events or side effects                                                                    | Page10/Line207-214                  | Safety/Paragraph1                     |

|                    |                                                |                   |  |
|--------------------|------------------------------------------------|-------------------|--|
| Conclusions        | General interpretation of the results          | Page6/Line116-118 |  |
| Trial registration | Registration number and name of trial register | Page6/Line116-118 |  |
| Funding            | Source of funding                              | Page6/Line116-118 |  |

*\* this item is specific to conference abstracts*

From: Hopewell S, Clarke M, Moher D, et al. CONSORT for reporting randomized controlled trials in journal and conference abstracts: explanation and elaboration. PLoS Med. 2008;5(1):e20
